# Supplementary material
Source: PubMed Central journal article supplement (PMC4527935)
Supplement: NIHMS701289-supplement-2.pdf [file NIHMS701289-supplement-2.pdf]

**Supplementary Table 1.** Residue-specific chemical shift differences ( $\Delta\omega$ ) between the ground and excited states of yAAC3 determined from the fitting of relaxation dispersion data to a two-state exchange model

| <b>Residue Number</b> | <b>Free yAAC3<br/><math>^{15}\text{N}</math> <math>\Delta\omega</math> (ppm)</b> | <b>yAAC3-ADP<br/><math>^{15}\text{N}</math> <math>\Delta\omega</math> (ppm)</b> | <b>yAAC3-CATR<br/><math>^{15}\text{N}</math> <math>\Delta\omega</math> (ppm)</b> |
|-----------------------|----------------------------------------------------------------------------------|---------------------------------------------------------------------------------|----------------------------------------------------------------------------------|
| 21                    | 1.0 $\pm$ 0.5                                                                    | no data                                                                         | no data                                                                          |
| 26                    | 5.7 $\pm$ 0.9                                                                    | 5.9 $\pm$ 0.4                                                                   | 6.1 $\pm$ 1.0                                                                    |
| 27                    | 3.5 $\pm$ 0.7                                                                    | 2.2 $\pm$ 1.4                                                                   | 2.6 $\pm$ 0.8                                                                    |
| 30                    | 3.6 $\pm$ 1.1                                                                    | 2.9 $\pm$ 1.5                                                                   | no data                                                                          |
| 31                    | 5.5 $\pm$ 1.4                                                                    | 5.3 $\pm$ 1.1                                                                   | 5.7 $\pm$ 1.4                                                                    |
| 41                    | 3.1 $\pm$ 0.2                                                                    | 3.7 $\pm$ 1.0                                                                   | 4.6 $\pm$ 0.8                                                                    |
| 42                    | 4.6 $\pm$ 0.6                                                                    | 4.0 $\pm$ 1.0                                                                   | no data                                                                          |
| 61                    | 4.7 $\pm$ 0.5                                                                    | 3.2 $\pm$ 1.2                                                                   | 3.1 $\pm$ 0.3                                                                    |
| 70                    | 2.2 $\pm$ 0.3                                                                    | 1.8 $\pm$ 1.3                                                                   | 1.2 $\pm$ 0.4                                                                    |
| 78                    | 1.3 $\pm$ 0.2                                                                    | no data                                                                         | no data                                                                          |
| 81                    | 1.2 $\pm$ 0.2                                                                    | 1.4 $\pm$ 0.4                                                                   | no data                                                                          |
| 82                    | 2.5 $\pm$ 0.7                                                                    | 1.8 $\pm$ 0.9                                                                   | 1.5 $\pm$ 0.2                                                                    |
| 84                    | 3.7 $\pm$ 1.2                                                                    | 4.2 $\pm$ 1.3                                                                   | 5.1 $\pm$ 1.2                                                                    |
| 85                    | 4.9 $\pm$ 1.2                                                                    | 7.8 $\pm$ 1.5                                                                   | no data                                                                          |
| 91                    | 1.2 $\pm$ 0.2                                                                    | 1.3 $\pm$ 0.5                                                                   | 4.9 $\pm$ 0.5                                                                    |
| 95                    | 2.1 $\pm$ 0.8                                                                    | 2.0 $\pm$ 1.1                                                                   | 2.7 $\pm$ 0.6                                                                    |
| 96                    | 3.2 $\pm$ 0.3                                                                    | no data                                                                         | no data                                                                          |
| 124                   | 1.2 $\pm$ 0.2                                                                    | no data                                                                         | no data                                                                          |
| 146                   | 1.1 $\pm$ 0.6                                                                    | 0.3 $\pm$ 0.2                                                                   | no data                                                                          |
| 166                   | 1.1 $\pm$ 1.0                                                                    | 0.8 $\pm$ 0.6                                                                   | no data                                                                          |
| 167                   | no data                                                                          | 1.1 $\pm$ 0.2                                                                   | no data                                                                          |
| 170                   | 1.5 $\pm$ 0.6                                                                    | no data                                                                         | no data                                                                          |
| 174                   | 1.3 $\pm$ 0.3                                                                    | 1.1 $\pm$ 0.3                                                                   | no data                                                                          |
| 246                   | 2.4 $\pm$ 0.2                                                                    | 1.6 $\pm$ 0.2                                                                   | 1.5 $\pm$ 0.3                                                                    |
| 247                   | 1.2 $\pm$ 0.6                                                                    | 0.9 $\pm$ 0.5                                                                   | 0.7 $\pm$ 0.5                                                                    |
| 268                   | 1.4 $\pm$ 0.3                                                                    | 1.1 $\pm$ 0.3                                                                   | 0.6 $\pm$ 0.5                                                                    |
| 291                   | 5.5 $\pm$ 1.4                                                                    | no data                                                                         | 5.3 $\pm$ 0.4                                                                    |
| 292                   | not resolved                                                                     | not resolved                                                                    | 6.2 $\pm$ 0.4                                                                    |
| 294                   | 4.5 $\pm$ 0.2                                                                    | 4.2 $\pm$ 1.0                                                                   | no data                                                                          |

**Supplementary Table 2.** Kinetic and thermodynamic parameters of yAAC3 derived from relaxation dispersion measurements measured at three fields.

| <b>State</b> | <b>Protein Region</b> | <b><math>k_{ex}</math> (<math>s^{-1}</math>)</b> | <b><math>p_e</math> (%)</b> |
|--------------|-----------------------|--------------------------------------------------|-----------------------------|
| Free yAAC3   | TM helices            | $470 \pm 100$                                    | $1.5 \pm 0.2$               |
| yAAC3-ADP    | TM helices            | $1600 \pm 300$                                   | $2.2 \pm 0.5$               |
